# Supplementary material
Source: PubMed Central journal article supplement (PMC4418657)
Supplement: NIHMS682136-supplement-Supplemental_Figures.pdf [file NIHMS682136-supplement-Supplemental_Figures.pdf]

# CHEMBIOCHEM

## Supporting Information

### **Improving Cell-Free Protein Synthesis through Genome Engineering of *Escherichia coli* Lacking Release Factor 1**

Seok Hoon Hong,<sup>[a]</sup> Yong-Chan Kwon,<sup>[a]</sup> Rey W. Martin,<sup>[a]</sup> Benjamin J. Des Soye,<sup>[b]</sup> Alexandra M. de Paz,<sup>[b]</sup> Kirsten N. Swonger,<sup>[a]</sup> Ioanna Ntai,<sup>[c]</sup> Neil L. Kelleher,<sup>[b, c]</sup> and Michael C. Jewett<sup>\*[a, b]</sup>

cbic\_201402708\_sm\_miscellaneous\_information.pdf

## Supplementary Tables

**Table S1. Primers used for MAGE, MASC PCR, and DNA sequencing.** Underlined bold text indicates mismatch and frameshift insertion. Four bases at 5'-MAGE oligos were phosphorothioated (\*).

| Primer Name                       | Primer Sequence (listed 5' to 3')                                                                                                    |
|-----------------------------------|--------------------------------------------------------------------------------------------------------------------------------------|
| <b>MAGE</b>                       |                                                                                                                                      |
| rna-MAGE                          | G*C*T*G*ATTTTCTGACCGTACATGGTCTGTGGCCAGGA <u><b>ATGTAA</b></u><br><u><b>ATGCTGATGTA</b></u> ATTGCCTAAATCGGTTGCTGCCCGTGGTGTGATG<br>AAC |
| csdA-MAGE                         | G*C*T*C*TGGCTGATGTCAGGACGGGTAGTCACGCT <u><b>TCAGTTAAA</b></u><br>TGCGCACTTCCTGCGGCTCTTTCATAAAGCGGCGGGTAATGCGACG<br>A                 |
| rnb-MAGE                          | A*T*T*T*TGTCACCATCGACAGTGCCAGCACAGAAGATATGGATT<br><u><b>AACTGACT</b></u> TTTTCGCTAAGGCGTTGCCGGATGACAACTTCAGCTG<br>AT                 |
| mazF-MAGE                         | T*T*G*A*TTGCGTTGTACAAGGAACACACAGACACATACCTGTTTT<br>GTTGTT <u><b>TCAGTTA</b></u> GAAAGGACTCAGGACAACAGCTGGACGATGTC<br>C                |
| endA-MAGE                         | C*G*G*T*AAAAGTCCACGCTGACGCGCCCGGTACGTTTTATTGCTA<br><u><b>ACTGAAAA</b></u> TTAACTGGCAGGGCAAAAAAGGCGTTGTTGATCTGC<br>A                  |
| <b>MASC PCR</b>                   |                                                                                                                                      |
| rna-wt-F                          | GTACATGGTCTGTGGCCAGGATTGC                                                                                                            |
| rna-mut-F                         | GGCCAGGA <u><b>ATGTAAATGCTGATGTA</b></u>                                                                                             |
| rna-R                             | TGGCATGACTTCACTTAGTTTTAGC                                                                                                            |
| csdA-wt-F                         | GCCGCAGGAAGTGCGCATTCACTCC                                                                                                            |
| csdA-mut-F                        | GCCGCAGGAAGTGCGCATT <u><b>TA</b></u> <u><b>ACTGA</b></u>                                                                             |
| csdA-R                            | CAGTGCGCGGTATTGATCCAGATCGC                                                                                                           |
| rnb-wt-F                          | CCAGCACAGAAGATATGGATGACGCC                                                                                                           |
| rnb-mut-F                         | CCAGCACAGAAGATATGGAT <u><b>TA</b></u> <u><b>ACTGA</b></u>                                                                            |
| rnb-R                             | TCACTTTCAGGCTGCCAGTCACCGG                                                                                                            |
| mazF-wt-F                         | CTGTTGTCCTGAGTCCTTTCATGTAC                                                                                                           |
| mazF-mut-F                        | CTGTTGTCCTGAGTCCTTTC <u><b>TA</b></u> <u><b>ACTGA</b></u>                                                                            |
| mazF-R                            | GGCTTTAATGAGTTGTAATTCCTCTG                                                                                                           |
| endA-wt-F                         | CCCGGTACGTTTTATTGCGGATGT                                                                                                             |
| endA-mut-F                        | CCCGGTACGTTTTATTGCT <u><b>TA</b></u> <u><b>ACTGA</b></u>                                                                             |
| endA-R                            | GCTGGCGCTGGTAATTCGGCGTCA                                                                                                             |
| <b>prfA deletion confirmation</b> |                                                                                                                                      |
| prfA-F                            | TGATCTGCAAAGCATCATTTCCG                                                                                                              |
| prfA-R                            | TTGCCTCACGTAACCAAGTGTGATA                                                                                                            |
| prfA-R2                           | CATAACGGCTGTACATACGGAACAG                                                                                                            |
| <b>CAT plasmid construction</b>   |                                                                                                                                      |
| pY71-FW                           | GGGCGTAAGTCGACCGGCTGCTA                                                                                                              |
| pY71-RV                           | TTCTCCATATGTATATCTCCTTCTTAAAGTT                                                                                                      |
| CAT-FW                            | ATATACATATGGAGAAAAAATCACTGG                                                                                                          |
| CAT-RV                            | CGGTCTGACTTACGCCCCGCCCTG                                                                                                             |
| <b>DNA sequencing</b>             |                                                                                                                                      |

---

|                                      |                                    |
|--------------------------------------|------------------------------------|
| rna-seq-F                            | GTTTCTCTGCTTCCCTTCTTCT             |
| csdA-seq-F                           | CTGCTGGACCACCTGAAACGTGGCA          |
| rnb-seq-F                            | CTGAAAGGCGATCGTTCTTTCTATG          |
| mazF-seq-F                           | GTAAAGAGCCCGTATTTACGCTTGC          |
| endA-seq-F                           | ATGTACCGTTATTTGTCTATTGCTGC         |
| <b>mRNA stability</b>                |                                    |
| T7-pro-F                             | TCGATCCCGCGAAATTAATACGACTCACTATAGG |
| T7-ter-R                             | CAAAAACCCCTCAAGACCCGTTTA           |
| <b>Orthogonal tRNA amplification</b> |                                    |
| T7tRNA500-F                          | CCGAAGGTAAGTGGCTTCAGCAGAG          |
| T7tRNAopt-R                          | TGGTCCGGCGGAGGGGATTTGAACCCCTG      |

---

**Table S2. Strains and plasmids used in this study.** Km<sup>R</sup>, Sp<sup>R</sup>, Ap<sup>R</sup>, and Cm<sup>R</sup> are kanamycin, spectinomycin, ampicillin, and chloramphenicol resistance, respectively. ‘Δ’ indicates deleted gene, and superscript ‘-’ indicates disabled gene via MAGE.

| Strains and plasmids                                  | Genotype/relevant characteristics                                                                                                                                                                                                                                                                                                                                                                                                                                                          | Source                   |
|-------------------------------------------------------|--------------------------------------------------------------------------------------------------------------------------------------------------------------------------------------------------------------------------------------------------------------------------------------------------------------------------------------------------------------------------------------------------------------------------------------------------------------------------------------------|--------------------------|
| <b>Strains</b>                                        |                                                                                                                                                                                                                                                                                                                                                                                                                                                                                            |                          |
| EcNR2                                                 | <i>MG1655</i> with $\lambda$ -prophage:: <i>bioA/bioB</i> and <i>cmR</i> :: <i>mutS</i>                                                                                                                                                                                                                                                                                                                                                                                                    | [1]                      |
| BL21 (DE3)                                            | <i>fhuA2 [lon] ompT gal</i> ( $\lambda$ DE3) [ <i>dcm</i> ] $\Delta$ <i>hsdS</i><br>$\lambda$ DE3 = $\lambda$ <i>sBamH1o</i> $\Delta$ <i>EcoRI-B</i><br><i>int</i> ::( <i>lacI</i> :: <i>PlacUV5</i> :: <i>T7 gene1</i> ) <i>i21</i> $\Delta$ <i>nin5</i>                                                                                                                                                                                                                                  | New England Biolabs      |
| BL21 Star <sup>TM</sup> (DE3)<br><i>rEc.E13.ΔprfA</i> | F <sup>-</sup> <i>ompT hsdS<sub>B</sub></i> ( <i>r<sub>B</sub><sup>-</sup>m<sub>B</sub><sup>-</sup></i> ) <i>gal dcm rne131</i> (DE3)<br>$\Delta$ <i>prfA</i> $\Omega$ Sp <sup>R</sup> , Ap <sup>R</sup> , Cm <sup>R</sup> , EcNR2 derivative<br>with 13 TAG termination reassigned to TAA<br>at <i>coaD</i> , <i>hda</i> , <i>hemA</i> , <i>mreC</i> , <i>murF</i> , <i>lola</i> , <i>lpxK</i> ,<br><i>yafF</i> , <i>pfpA</i> , <i>sucB</i> , <i>fabH</i> , <i>fliN</i> , and <i>atpE</i> | Life Technologies<br>[2] |
| MCJ.340                                               | <i>rEc.E13.ΔprfA rna</i> <sup>-</sup>                                                                                                                                                                                                                                                                                                                                                                                                                                                      | This study               |
| MCJ.435                                               | <i>rEc.E13.ΔprfA rnb</i> <sup>-</sup>                                                                                                                                                                                                                                                                                                                                                                                                                                                      | This study               |
| MCJ.436                                               | <i>rEc.E13.ΔprfA csdA</i> <sup>-</sup>                                                                                                                                                                                                                                                                                                                                                                                                                                                     | This study               |
| MCJ.437                                               | <i>rEc.E13.ΔprfA mazF</i> <sup>-</sup>                                                                                                                                                                                                                                                                                                                                                                                                                                                     | This study               |
| MCJ.495                                               | <i>rEc.E13.ΔprfA endA</i> <sup>-</sup>                                                                                                                                                                                                                                                                                                                                                                                                                                                     | This study               |
| MCJ.438                                               | <i>rEc.E13.ΔprfA rnb</i> <sup>-</sup> <i>mazF</i> <sup>-</sup>                                                                                                                                                                                                                                                                                                                                                                                                                             | This study               |
| MCJ.527                                               | <i>rEc.E13.ΔprfA csdA</i> <sup>-</sup> <i>rnb</i> <sup>-</sup>                                                                                                                                                                                                                                                                                                                                                                                                                             | This study               |
| MCJ.526                                               | <i>rEc.E13.ΔprfA csdA</i> <sup>-</sup> <i>mazF</i> <sup>-</sup>                                                                                                                                                                                                                                                                                                                                                                                                                            | This study               |
| MCJ.560                                               | <i>rEc.E13.ΔprfA rnb</i> <sup>-</sup> <i>endA</i> <sup>-</sup>                                                                                                                                                                                                                                                                                                                                                                                                                             | This study               |
| MCJ.559                                               | <i>rEc.E13.ΔprfA csdA</i> <sup>-</sup> <i>endA</i> <sup>-</sup>                                                                                                                                                                                                                                                                                                                                                                                                                            | This study               |
| MCJ.561                                               | <i>rEc.E13.ΔprfA mazF</i> <sup>-</sup> <i>endA</i> <sup>-</sup>                                                                                                                                                                                                                                                                                                                                                                                                                            | This study               |
| MCJ.485                                               | <i>rEc.E13.ΔprfA csdA</i> <sup>-</sup> <i>rnb</i> <sup>-</sup> <i>mazF</i> <sup>-</sup>                                                                                                                                                                                                                                                                                                                                                                                                    | This study               |
| MCJ.537                                               | <i>rEc.E13.ΔprfA csdA</i> <sup>-</sup> <i>rnb</i> <sup>-</sup> <i>mazF</i> <sup>-</sup> <i>endA</i> <sup>-</sup>                                                                                                                                                                                                                                                                                                                                                                           | This study               |
| <b>Plasmids</b>                                       |                                                                                                                                                                                                                                                                                                                                                                                                                                                                                            |                          |
| pY71-sfGFP                                            | Km <sup>R</sup> , <i>P<sub>T7</sub></i> ::super folder <i>gfp</i> ( <i>sfGFP</i> ), C-terminal strep-tag                                                                                                                                                                                                                                                                                                                                                                                   | [3]                      |
| pY71-sfGFP-T216amb                                    | pY71-sfGFP with amber codon at T216                                                                                                                                                                                                                                                                                                                                                                                                                                                        | [3]                      |
| pY71-sfGFP-2amb                                       | pY71-sfGFP with amber codon at N212 and T216                                                                                                                                                                                                                                                                                                                                                                                                                                               | [4]                      |
| pY71-sfGFP-5amb                                       | pY71-sfGFP with amber codon at D36, K101, E132, D190, and E213                                                                                                                                                                                                                                                                                                                                                                                                                             | [4]                      |
| pY71-CAT                                              | Km <sup>R</sup> , <i>P<sub>T7</sub></i> ::CAT (chloramphenicol acetyl transferase)                                                                                                                                                                                                                                                                                                                                                                                                         | This study               |
| pY71-CAT-D112amb                                      | pY71-CAT with amber codon at D122                                                                                                                                                                                                                                                                                                                                                                                                                                                          | This study               |
| pY71-pAcFRS                                           | <i>P<sub>T7</sub></i> ::pAcFRS, C-terminal 6x histidine tag                                                                                                                                                                                                                                                                                                                                                                                                                                | [4]                      |
| pY71-mRFP1-Spinach                                    | <i>P<sub>T7</sub></i> ::mRFP1-Spinach aptamer                                                                                                                                                                                                                                                                                                                                                                                                                                              | [5]                      |
| pDULE-o-tRNA                                          | <i>P<sub>lpp</sub></i> ::o-tRNA, Tet <sup>R</sup>                                                                                                                                                                                                                                                                                                                                                                                                                                          | [3]                      |
| pY71-T7-tz-o-tRNA <sup>opt</sup>                      | <i>P<sub>T7</sub></i> :: hammer-head ribozyme, o-tRNA <sup>opt</sup>                                                                                                                                                                                                                                                                                                                                                                                                                       | [4]                      |

**Table S3. Doubling time of MAGE strains.** Cells were grown in 2xYTPG medium at 34°C in a 96-well plate.

| Strains              | Doubling time (min) | Percentage (%) |
|----------------------|---------------------|----------------|
| <i>rEc.E13.ΔprfA</i> | 34.5 ± 0.4          | 100            |
| MCJ.340              | 38.1 ± 0.4          | 110            |
| MCJ.435              | 43.8 ± 0.8          | 127            |
| MCJ.436              | 41.7 ± 0.4          | 121            |
| MCJ.437              | 32.4 ± 0.0          | 94             |
| MCJ.438              | 52.5 ± 0.4          | 152            |
| MCJ.527              | 42 ± 2              | 121            |
| MCJ.526              | 40 ± 1              | 116            |
| MCJ.485              | 38 ± 1              | 111            |
| MCJ.495              | 34 ± 1              | 97             |
| MCJ.560              | 39 ± 1              | 114            |
| MCJ.559              | 36.6 ± 0.6          | 106            |
| MCJ.561              | 33.0 ± 0.8          | 96             |
| MCJ.537              | 39.5 ± 0.9          | 114            |

**Table S4. Monoisotopic masses calculated from mass spectrometric data.** ‘Experiment’ indicates experimentally obtained protein mass, and ‘Theoretical’ indicates theoretically calculated protein mass.

| <b>sfGFP species</b>                                     | <b>Mass<br/>(Da,<br/>Experiment)</b> | <b>Mass<br/>(Da,<br/>Theoretical)</b> | <b>Error<br/>(ppm)</b> | <b>Shift from<br/>WT-sfGFP<br/>(Da,<br/>Experiment)</b> | <b>Shift from<br/>WT-sfGFP<br/>(Da,<br/>Theoretical)</b> |
|----------------------------------------------------------|--------------------------------------|---------------------------------------|------------------------|---------------------------------------------------------|----------------------------------------------------------|
| <b>WT-sfGFP</b>                                          | 26847.50                             | 26847.45                              | 2.6                    | -                                                       | -                                                        |
| <b>sfGFP-1pAcF<br/>(T216)</b>                            | 26935.54                             | 26935.48                              | 2.2                    | 88.04                                                   | 88.03                                                    |
| <b>sfGFP-2pAcF<br/>(N212, T216)</b>                      | 27010.56                             | 27010.52                              | 1.5                    | 163.06                                                  | 163.07                                                   |
| <b>sfGFP-5pAcF<br/>(D36, K101, E132,<br/>D190, E213)</b> | 27176.66                             | 27176.61                              | 1.8                    | 329.16                                                  | 329.16                                                   |

Supplementary Figures

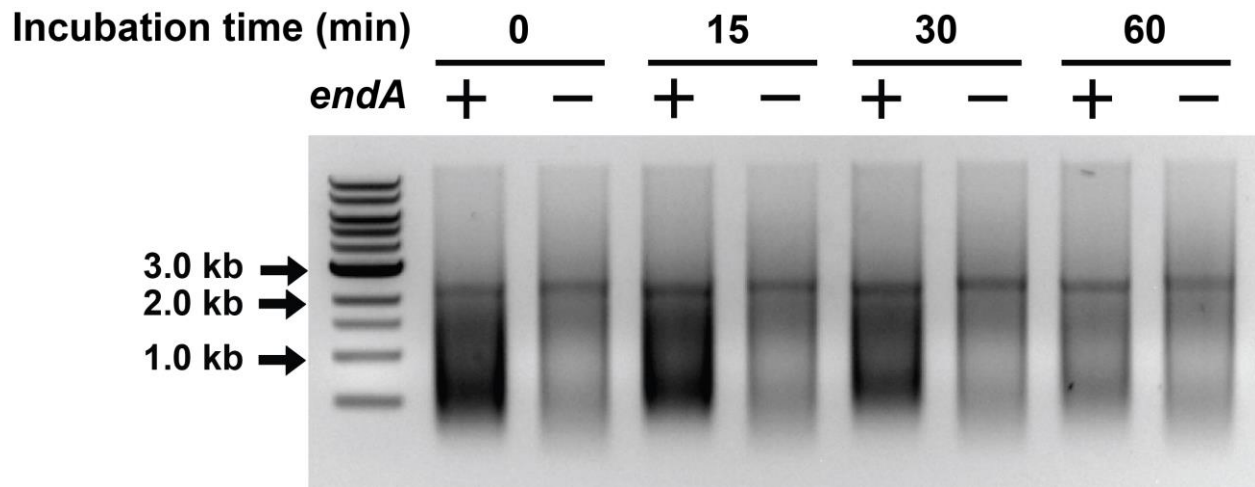

**Figure S1. DNA gel to assess degradation of plasmid DNA in crude extracts with or without endonuclease I.** pY71-sfGFP plasmid DNA was incubated with cell extracts from *rEc.E13.AprfA* (*endA*<sup>+</sup>) and MCJ.495 (*endA*<sup>-</sup>) strains for 0, 15, 30 and 60 min at 30°C. Samples were RNase A treated and purified using phenol:chloroform:isoamyl alcohol solution followed by DNA purification kit. The purified plasmid DNA was linearized by BamHI digestion prior to loading on agarose gel (0.7%). Expected band size was 2.5 kb.

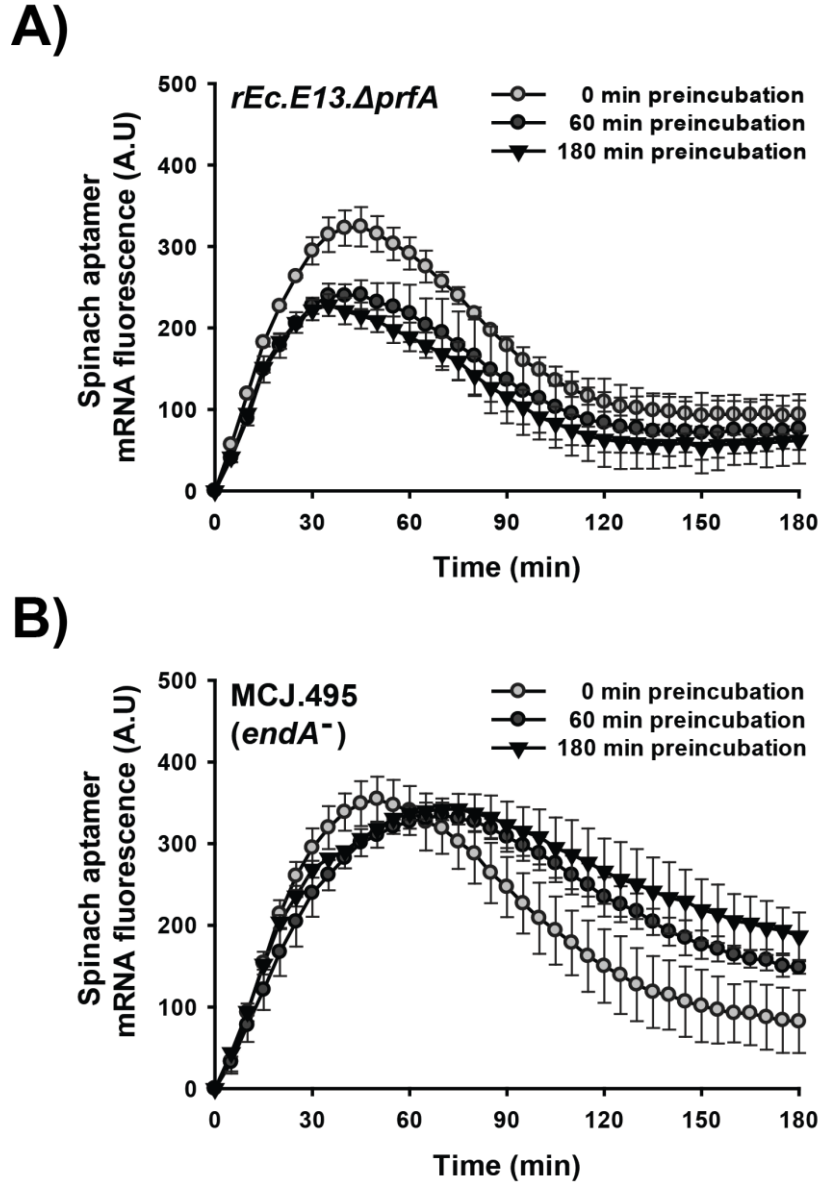

**Figure S2. Time course Spinach aptamer mRNA synthesis using A) endonuclease I present (*rEc.E13.ΔprfA*) and B) deficient (MCJ.495) extract.** Plasmid DNA containing Spinach aptamer gene was preincubated for 0, 60, and 180 min with cell extract and DFHBI. CFPS reactions were performed upon adding CFPS reagents and monitored for 180 min. Maximum mRNA fluorescence was taken for the comparison of mRNA stability in Figure 2B of the main text. At least three independent reactions for each sample were performed at 30°C. One standard deviation is shown.



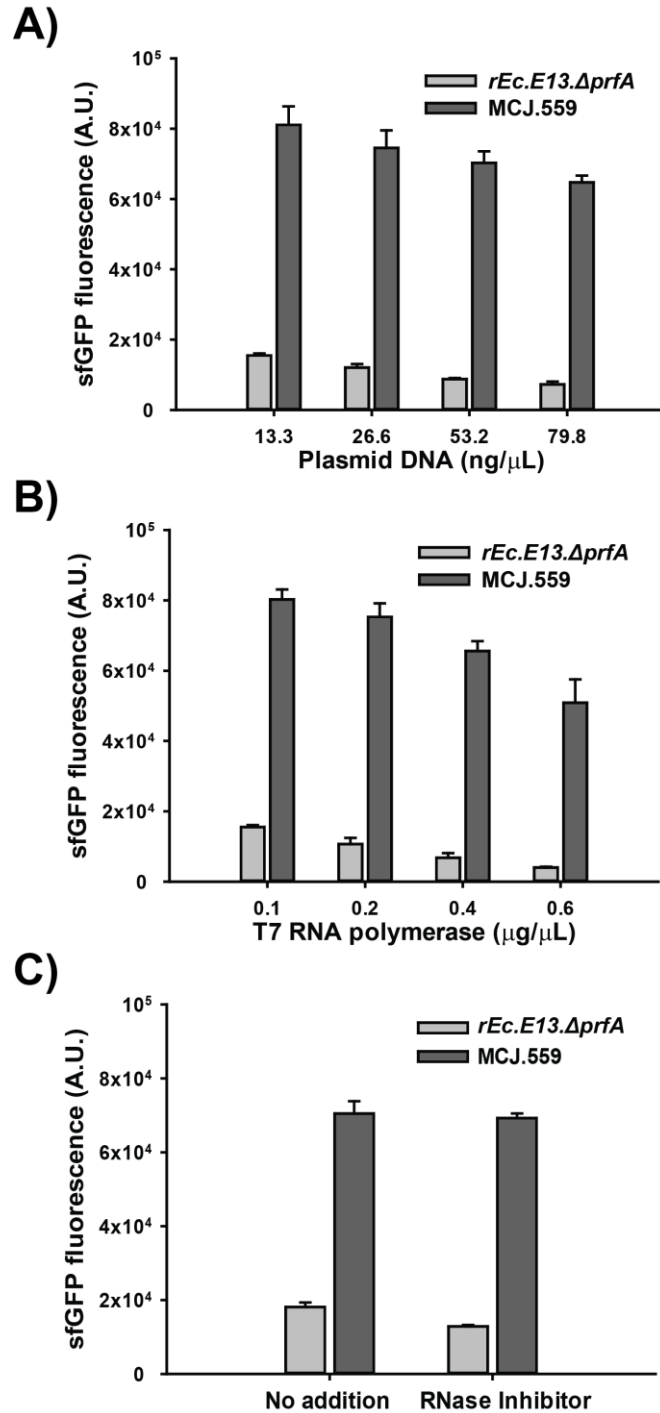

**Figure S3. Optimization of plasmid DNA and T7 RNA polymerase and the effect of RNase inhibitor in CFPS reactions.** CFPS yields observed by increasing the concentration of **A)** plasmid DNA and **B)** T7 RNA polymerase using the extracts from *rEc.E13.ΔprfA* and MCJ.559. **C)** CFPS yields observed in the presence or absence of RNase inhibitor. At least three independent reactions for each sample were performed for 20 h at 30°C. One standard deviation is shown.

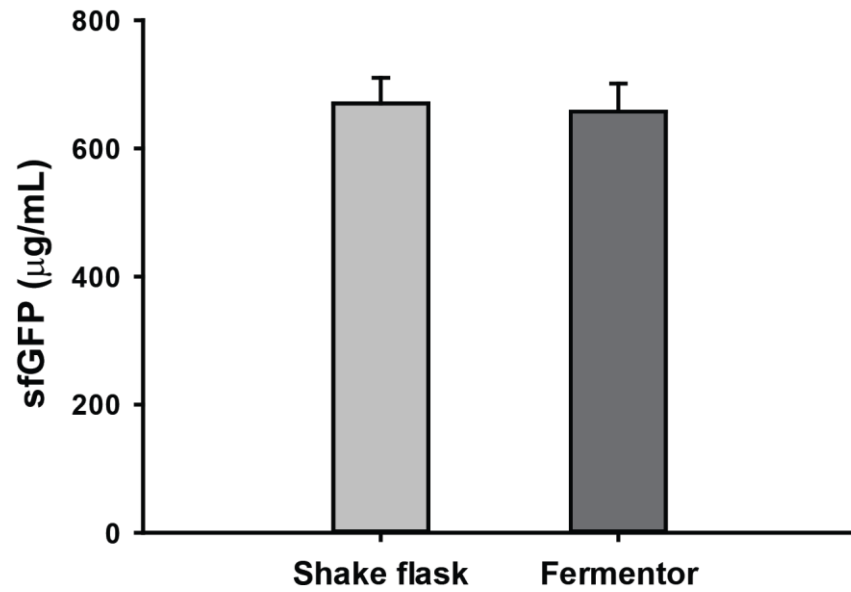

**Figure S4. Cell extract performance comparison between shake flask- and fermentor-grown MCJ.559.** sfGFP synthesis was quantified by measuring the fluorescence in CFPS reactions. Three independent reactions for each sample were performed for 20 h at 30°C. One standard deviation is shown.

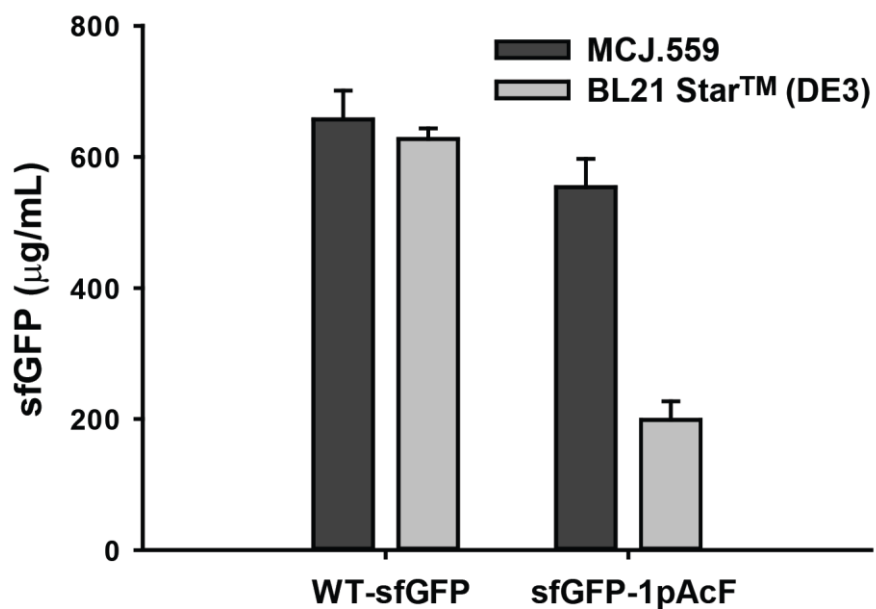

**Figure S5. Cell extract performance comparison between MCJ.559 and BL21 Star™ (DE3) extract.** Active sfGFP synthesis was quantified by measuring fluorescence in CFPS reactions. Single pAcF was incorporated to the amber position corresponding to T216 of sfGFP. Three independent reactions for each sample were performed for 20 h at 30°C. One standard deviation is shown.

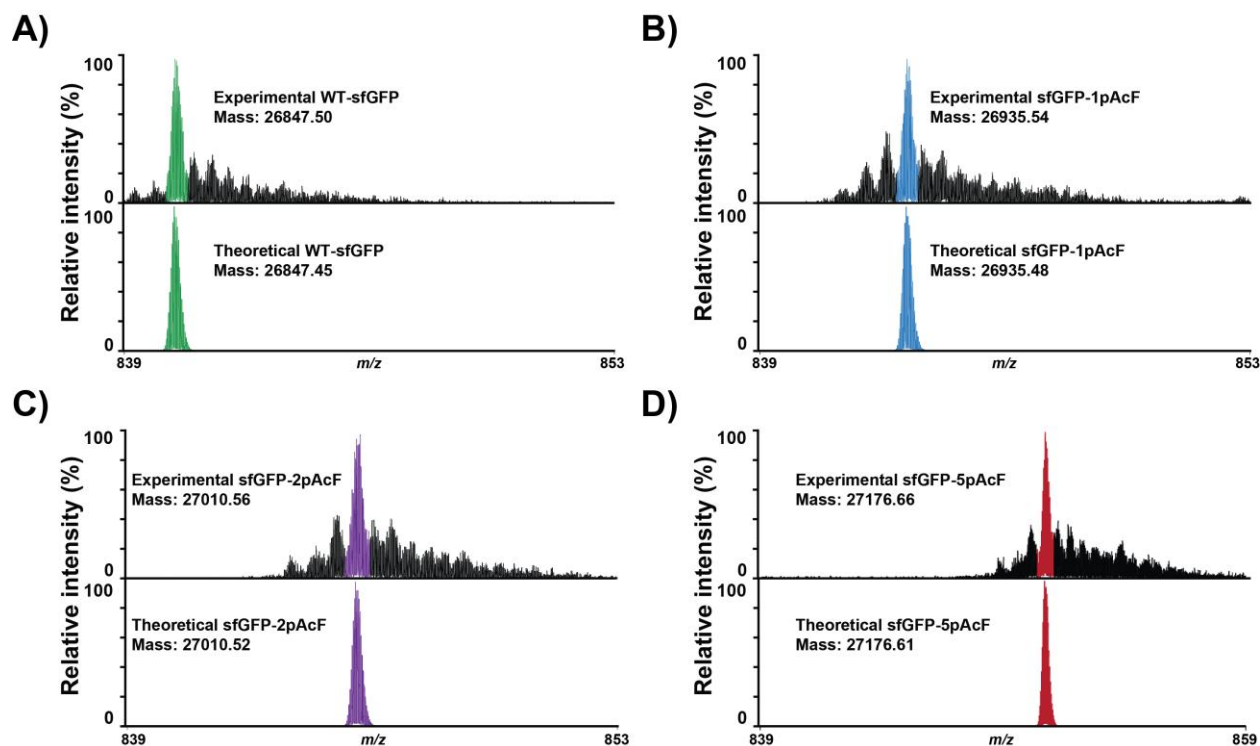

**Figure S6. Mass spectrometry analysis of pAcF incorporation for 1, 2, and 5 amber sites.** Experimental and theoretical mass peaks of **A)** wild-type sfGFP, **B)** sfGFP containing single pAcF corresponding to the position of T216, **C)** sfGFP containing two pAcF corresponding to the positions of N212 and T216, and **D)** sfGFP containing five pAcF corresponding to the positions of D36, K101, E132, D190, and E213.

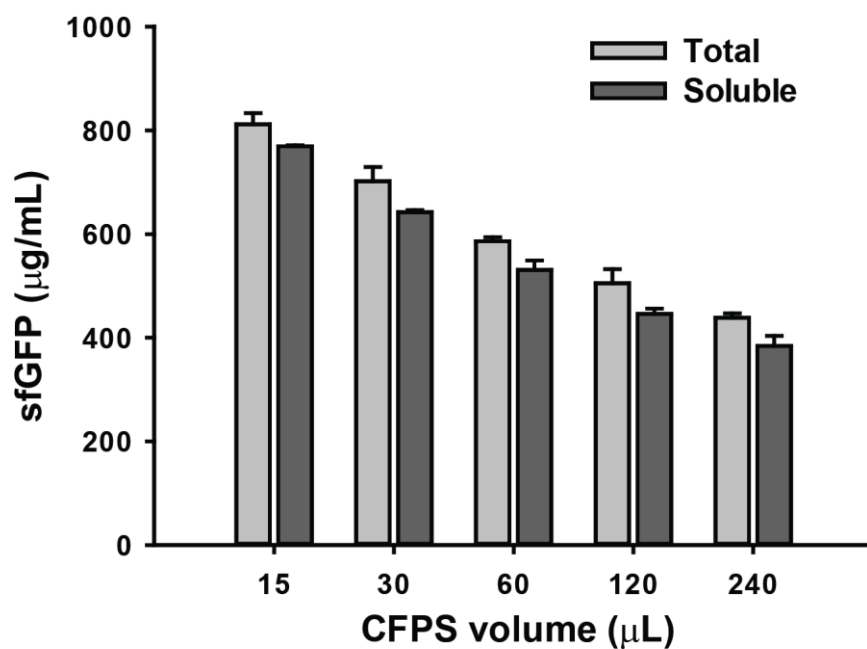

**Figure S7. Radioactive  $^{14}\text{C}$ -Leu incorporation of scale up CFPS reactions using MCJ.559 extract indicates decreasing protein expression yields with increasing reaction volume.** Wild-type sfGFP was synthesized in different reaction volumes using a microcentrifuge tube. The total and soluble protein production was assessed by counting radioactive  $^{14}\text{C}$ -Leu incorporation. At least three independent reactions for each sample were performed for 20 h at  $30^\circ\text{C}$ . One standard deviation is shown.

## REFERENCES

- [1] H. H. Wang, F. J. Isaacs, P. A. Carr, Z. Z. Sun, G. Xu, C. R. Forest, G. M. Church, *Nature* **2009**, *460*, 894-898.
- [2] M. J. Lajoie, A. J. Rovner, D. B. Goodman, H.-R. Aerni, A. D. Haimovich, G. Kuznetsov, J. A. Mercer, H. H. Wang, P. A. Carr, J. A. Mosberg, N. Rohland, P. G. Schultz, J. M. Jacobson, J. Rinehart, G. M. Church, F. J. Isaacs, *Science* **2013**, *342*, 357-360.
- [3] B. C. Bundy, J. R. Swartz, *Bioconjug. Chem.* **2010**, *21*, 255-263.
- [4] S. H. Hong, I. Ntai, A. D. Haimovich, N. L. Kelleher, F. J. Isaacs, M. C. Jewett, *ACS Synth. Biol.* **2014**, *3*, 398-409.
- [5] B. R. Fritz, O. K. Jamil, M. C. Jewett, **2014**, Submitted.
